# Supplementary material for: Shoulder girdle injuries involving the medial clavicle differ from lateral clavicle injuries with a focus on concomitant injuries and management strategies: A retrospective study based on nationwide routine data
Source: PLoS One. 2019 Oct 25;14(10):e0224370. doi: 10.1371/journal.pone.0224370 (PMC6814233; doi:10.1371/journal.pone.0224370)
Supplement: S1 Table — Concomitant thoracic injuries of sternoclavicular joint dislocations (S43.2) and of medial clavicle fractures (S42.01) are presented as an absolute and relative number in relation to all concomitant thoracic injuries categorized by the specific thoracic injury from 2012 to 2014. ICD = code of the diagnosis by ICD-10; SD = secondary diagnosis; MD = main diagnosis; SD+MD = all diagnoses (secondary and main diagnosis); S43.2 = sternoclavicular joint dislocation; S42.01 = medial clavicle fracture; n = absolute number of cases; % = relative amount in relation to all concomitant thoracic injuries of the respective medial clavicle injury. (XLSX) [file pone.0224370.s001.xlsx]

## Sheet: S1 Table
	Type of Injury		S42.01						S43.2
			SD		MD		SD+MD		SD		MD		SD+MD
			n	%	n	%	n	%	n	%	n	%	n	%
	Contusion of mamma		0	0	3	0.18018	3	0.112528	0	0	0	0	0	0
	Contusion of thorax		17	1.6983	389	23.3634	406	15.2288	2	2.46914	21	42	23	17.5573
	Other superficial injury of anterior chest wall - abrasion		0	0	4	0.24024	4	0.150038	0	0	0	0	0	0
	Other superficial injury of anterior chest wall - superficial foreign body		0	0	1	0.0600601	1	0.0375094	0	0	0	0	0	0
	Other superficial injury of posterior chest wall - abrasion		0	0	4	0.24024	4	0.150038	0	0	0	0	0	0
	Superficial injury of other and unspecified thoracic parts		0	0	1	0.0600601	1	0.0375094	0	0	0	0	0	0
	Superficial injury of other and unspecified thoracic parts - abrasion		0	0	5	0.3003	5	0.187547	0	0	0	0	0	0
	Superficial injury of other and unspecified thoracic parts - contusion		0	0	13	0.780781	13	0.487622	0	0	1	2	1	0.763359
	Open wound of anterior chest wall		1	0.0999001	1	0.0600601	2	0.0750188	0	0	0	0	0	0
	Open wound of posterior chest wall		0	0	0	0	0	0	0	0	1	2	1	0.763359
	Open wound with connection to intrathoracic injury		0	0	1	0.0600601	1	0.0375094	0	0	0	0	0	0
	Soft tissue damage of the first degree with a closed fracture or dislocation of the thorax		0	0	222	13.3333	222	8.32708	0	0	2	4	2	1.52672
	Soft tissue damage of the second degree with a closed fracture or dislocation of the thorax		0	0	17	1.02102	17	0.637659	0	0	0	0	0	0
	Soft tissue damage of the third degree with a closed fracture or dislocation of the thorax		0	0	1	0.0600601	1	0.0375094	0	0	0	0	0	0
	Soft tissue damage of the first degree with a open fracture or dislocation of the thorax		0	0	1	0.0600601	1	0.0375094	0	0	0	0	0	0
	Fracture of thoracic vertebra - unspecified level		1	0.0999001	1	0.0600601	2	0.0750188	0	0	0	0	0	0
	Fracture of thoracic vertebra - T1 and T2		9	0.899101	6	0.36036	15	0.562641	1	1.23457	1	2	2	1.52672
	Fracture of thoracic vertebra - T3 and T4		8	0.799201	7	0.42042	15	0.562641	1	1.23457	1	2	2	1.52672
	Fracture of thoracic vertebra - T5 and T6		20	1.998	11	0.660661	31	1.16279	0	0	1	2	1	0.763359
	Fracture of thoracic vertebra - T7 and T8		23	2.2977	9	0.540541	32	1.2003	1	1.23457	0	0	1	0.763359
	Fracture of thoracic vertebra - T9 and T10		13	1.2987	4	0.24024	17	0.637659	0	0	0	0	0	0
	Fracture of thoracic vertebra - T11 and T12		46	4.5954	11	0.660661	57	2.13803	1	1.23457	0	0	1	0.763359
	Multiple fractures of thoracic spine		3	0.2997	2	0.12012	5	0.187547	0	0	0	0	0	0
	Fracture of sternum		33	3.2967	25	1.5015	58	2.17554	7	8.64198	2	4	9	6.87023
	Fracture of first rib		9	0.899101	40	2.4024	49	1.83796	2	2.46914	2	4	4	3.05344
	Fracture of other rib		26	2.5974	148	8.88889	174	6.52663	7	8.64198	4	8	11	8.39695
	Serial rib fracture - unspecified		7	0.699301	18	1.08108	25	0.937734	1	1.23457	0	0	1	0.763359
	Serial rib fracture with participation of first rib		20	1.998	20	1.2012	40	1.50038	4	4.93827	0	0	4	3.05344
	Serial rib fracture with participation of two ribs		40	3.996	117	7.02703	157	5.88897	2	2.46914	0	0	2	1.52672
	Serial rib fracture with participation of three ribs		94	9.39061	126	7.56757	220	8.25206	3	3.7037	2	4	5	3.81679
	Serial rib fracture with participation of four and more ribs		286	28.5714	198	11.8919	484	18.1545	15	18.5185	4	8	19	14.5038
	Flail chest		15	1.4985	6	0.36036	21	0.787697	2	2.46914	0	0	2	1.52672
	Fracture of other parts of bony thorax		1	0.0999001	0	0	1	0.0375094	0	0	0	0	0	0
	Dislocation of thoracic vertebra with unspecified level		0	0	1	0.0600601	1	0.0375094	0	0	0	0	0	0
	Dislocation of other and unspecified thoracic parts		0	0	4	0.24024	4	0.150038	0	0	0	0	0	0
	Sprain and strain of thoracic spine		0	0	6	0.36036	6	0.225056	0	0	0	0	0	0
	Sprain and strain of other and unspecified thoracic parts		0	0	2	0.12012	2	0.0750188	0	0	0	0	0	0
	Complete paraplegic thoracic spinal cord injury		3	0.2997	0	0	3	0.112528	0	0	0	0	0	0
	Incomplete paraplegic thoracic spinal cord injury		4	0.3996	0	0	4	0.150038	0	0	0	0	0	0
	Injury of thoracic aorta		3	0.2997	1	0.0600601	4	0.150038	1	1.23457	0	0	1	0.763359
	Inury of Truncus brachiocephalicus or A. subclavia		2	0.1998	0	0	2	0.0750188	3	3.7037	0	0	3	2.29008
	Injury of V. brachiocephalica or V. subclavia		0	0	1	0.0600601	1	0.0375094	0	0	0	0	0	0
	Injury of unspecified thoracic vessel		0	0	1	0.0600601	1	0.0375094	0	0	0	0	0	0
	Injury of heart		1	0.0999001	0	0	1	0.0375094	0	0	0	0	0	0
	Contusion of heart		2	0.1998	3	0.18018	5	0.187547	1	1.23457	0	0	1	0.763359
	Other injuries of heart		1	0.0999001	1	0.0600601	2	0.0750188	0	0	0	0	0	0
	Traumatic pneumothorax		135	13.4865	86	5.16517	221	8.28957	7	8.64198	2	4	9	6.87023
	Traumatic hemothorax		39	3.8961	23	1.38138	62	2.32558	3	3.7037	1	2	4	3.05344
	Traumatic hemopneumothorax		73	7.29271	17	1.02102	90	3.37584	12	14.8148	0	0	12	9.16031
	Contusion and hematoma of the lung		59	5.89411	80	4.8048	139	5.2138	4	4.93827	2	4	6	4.58015
	Laceration of lung		1	0.0999001	0	0	1	0.0375094	0	0	0	0	0	0
	Injury of bronchus		1	0.0999001	1	0.0600601	2	0.0750188	0	0	0	0	0	0
	Injury of pleura		0	0	1	0.0600601	1	0.0375094	0	0	0	0	0	0
	Injury of diaphragm		4	0.3996	0	0	4	0.150038	0	0	0	0	0	0
	Injury of other unspecified intrathoracic organs and structures		0	0	1	0.0600601	1	0.0375094	0	0	2	4	2	1.52672
	Thoracic bruise		0	0	1	0.0600601	1	0.0375094	0	0	0	0	0	0
	Injury of muscles and tendons of thoracic level		0	0	6	0.36036	6	0.225056	0	0	0	0	0	0
	Multiple thoracic injuries		0	0	1	0.0600601	1	0.0375094	0	0	0	0	0	0
	Other specified thoracic injury		0	0	4	0.24024	4	0.150038	0	0	0	0	0	0
	Unspecified thoracic injury		1	0.0999001	12	0.720721	13	0.487622	1	1.23457	1	2	2	1.52672
	Total		1001	100	1665	100	2666	100	81	100	50	100	131	100
	Legend:
	ICD=code of the diagnosis by ICD-10
	SD=secondary diagnosis; MD=main diagnosis; SD+MD=all diagnoses (secondary as well as main diagnosis)
	S43.2=sternoclavicular joint dislocation; S42.01=medial clavicle fracture
	n=absolute number of cases
	%=relative amount in relation to all concomitant thoracic injuries of the respective medial clavicle injury.
